# Supplementary material
Source: publisher figshare collection journal article supplement (https://tandf.figshare.com/ndownloader/files/8748298)
Supplement: Supplementary file 1 [file 8748298]

**Supplemental Figure**

**
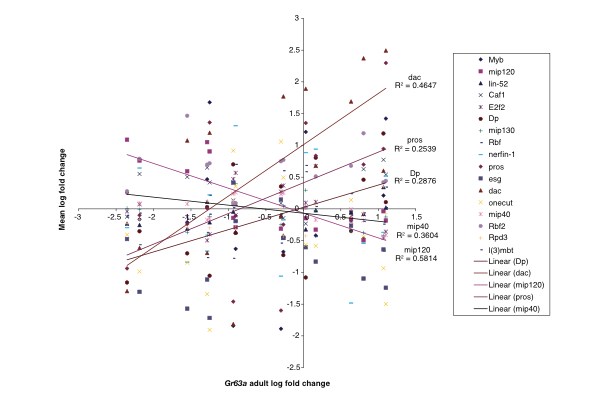
**

**Fig. S1. Developmental predictors of changes in *Gr63a* expression.** Plot of interspecies pairwise log fold change for Gr63a against interspecies pairwise log fold change for genes known to be involved in Gr63a expression, from RNASeq data (n=15 for each gene). Solid lines indicate linear regression.

**Supplemental Table**

| Table S1. List of species used for behavioral studies | |
| --- | --- |
|  |  |
| Species Name | Strain/Stock number/Location |
| *D. melanogaster* | Canton S |
| *D. sechellia* | 14021-0248.01, DSSC |
| *D. simulans* | 14021-0251.165, DSSC |
| *D. erecta* | 14021-0224.00, DSSC |
| *D. ananassae* | 14024-0371.00, DSSC |
| *D. willistoni* | 14030-0811.00, DSSC |
| *D. virilis* | 15010-1051.00, DSSC |
| *D. lummei* | 15010-1011.01, DSSC |
| *D. mojavensis* | 15081-1351.04, DSSC |
| *Zaprionus indianus* | 50001-1031.03, DSSC |
| *D. niveifrons* | New Guinea |
| *D. nasuta* | Mysore, India |
| *D. kohkoa* | Rizal, Phillipines |
| *D. pallidifrons* | Micronesia |
| *D. sulfurigaster* | Wau, New Guinea |
|  |  |
|  |  |
| *DSSC: Drosophila Species Stock Center, UC San Diego | |
